# Supplementary material
Source: publisher figshare collection journal article supplement (https://frontiersin.figshare.com/ndownloader/files/15050864)
Supplement: Supplementary file 1 [file 15050864]

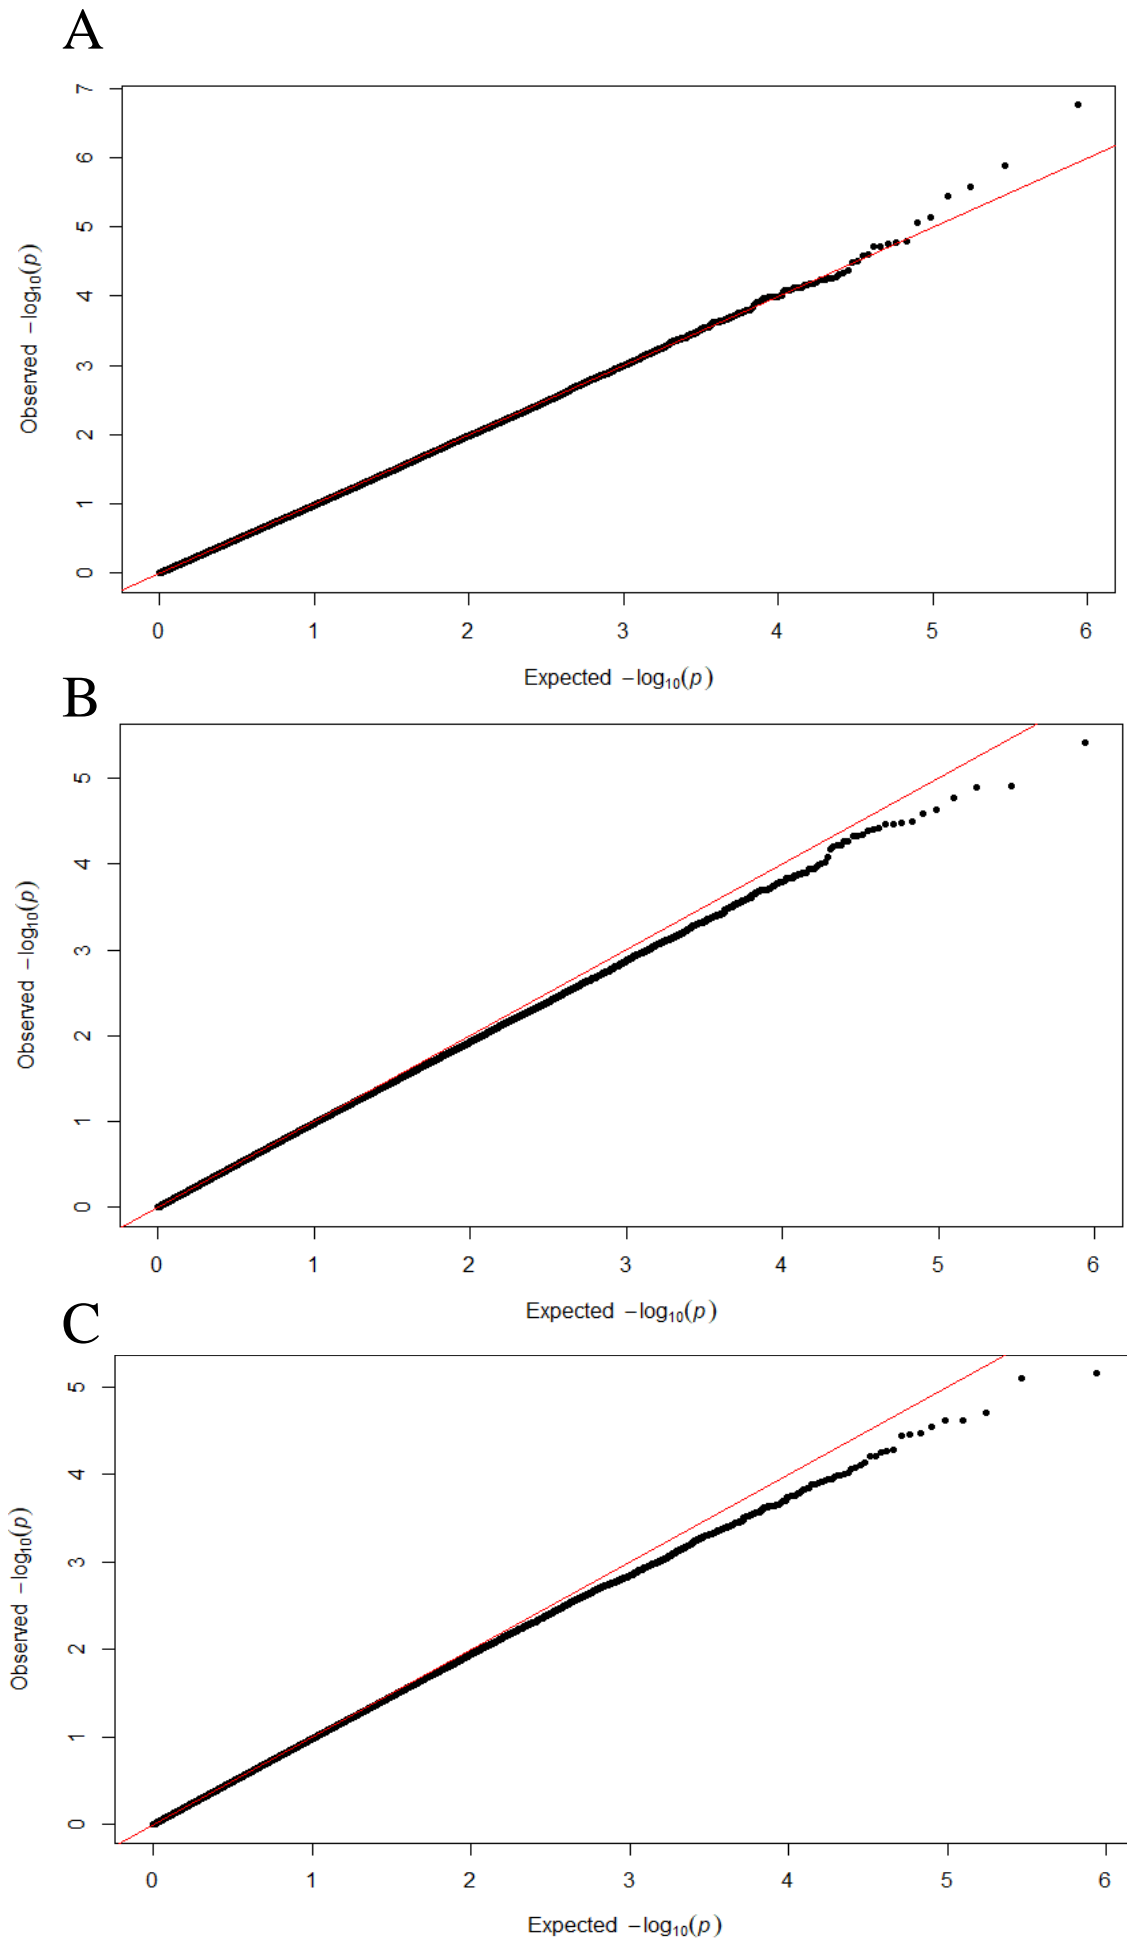

**Supplementary Figure 4.** Q-Q plots for GWAS analyses undertaken for A. *Tau* ( $\lambda = 0.973$ ), B. *onset phase* ( $\lambda = 0.980$ ) and C. *DD phase shift* ( $\lambda = 0.978$ ).
